# Supplementary material
Source: publisher site journal article supplement (https://www.dovepress.com/get_supplementary_file.php?f=267064.docx)
Supplement: Supplementary file 1 [file get_supplementary_file.php]

**Appendix A: PubMed Search Strategy**

| Cancer | ("neoplasms"[MeSH Terms] OR "cancer survivors"[MeSH Terms] OR "radiation"[MeSH Terms] OR "neoplasm"[Title/Abstract] OR "cancer"[Title/Abstract] OR "tumor"[Title/Abstract] OR "tumour"[Title/Abstract] OR "malignancy"[Title/Abstract] OR "malignant"[Title/Abstract] OR "chemotherapy"[Title/Abstract] OR "metastasis"[Title/Abstract] OR "metastases"[Title/Abstract] OR "radiotherapy"[Title/Abstract] OR "radiation"[Title/Abstract]) AND |
| --- | --- |
| Mindfulness | ("mindfulness"[MeSH Terms] OR "Meditation" [MeSH Terms] OR "mindful*"[ Title/Abstract] OR "Meditat*" [Title/Abstract] OR "mindfulness-based stress reduction"[Title/Abstract] OR "mbsr"[Title/Abstract] OR "mindfulness meditation"[Title/Abstract] OR "Mindfulness-Based Cognitive Therapy" [Title/Abstract] OR "mbct" [Title/Abstract] OR "Mindfulness‐Based Cancer Recovery"[Title/Abstract] OR "mbcr" [Title/Abstract]) |

**Supplemental Tables**

| **Table S1A: NIH Quality Assessment Tool for Controlled Studies** | | | | | | | | | | | | | | | |
| --- | --- | --- | --- | --- | --- | --- | --- | --- | --- | --- | --- | --- | --- | --- | --- |
|  | **Hoffman et al. 201234** | **Lengacher et al. 200927** | **Zhao et al. 202038** | **Johannsen et al. 201635** | **Foley et al. 201032** | **Park et al. 202037** | **Compen et al. 201833** | **Speca et al. 200021** | **Zernicke et al. 201424** | **Johns et al. 201631** | **Huberty et al. 201939** | **Russell et al. 201941** | **Campbell et al. 201225** | **Johns et al. 201530** | **Labelle et al. 201522** |
| Described as RCT | ✓ | ✓ | ✓ | ✓ | ✓ | ✓ | ✓ | ✓ | ✓ | ✓ | ✓ | ✓ | X | ✓ | X |
| Randomization method adequate | ✓ | CD | ✓ | ✓ | ✓ | ✓ | ✓ | ✓ | ✓ | ✓ | ✓ | ✓ | NA | ✓ | NA |
| Group allocation concealed | ✓ | CD | CD | CD | ✓ | CD | ✓ | CD | ✓ | ✓ | CD | ✓ | NA | ✓ | NA |
| Participants Blinded | X | X | ✓ | X | X | X | X | X | X | ✓ | ✓ | X | X | X | X |
| Outcome assessors blinded | X | ✓ | ✓ | CD | ✓ | CD | ✓ | CD | ✓ | ✓ | CD | ✓ | X | X | X |
| Groups similar at baseline | ✓ | ✓ | ✓ | ✓ | ✓ | ✓ | ✓ | ✓ | ✓ | ✓ | ✓ | ✓ | ✓ | X | ✓ |
| Drop-out <20% | ✓ | ✓ | ✓ | ✓ | ✓ | ✓ | ✓ | ✓ | ✓ | ✓ | X | X | ✓ | ✓ | X |
| Differential drop-out <15% | ✓ | ✓ | ✓ | X | ✓ | ✓ | X | ✓ | X | ✓ | ✓ | X | ✓ | ✓ | X |
| Adherence ≥ 50% | X | ✓ | CD | X | ✓ | X | CD | CD | X | ✓ | ✓ | CD | ✓ | ✓ | ✓ |
| Other treatment avoided | ✓ | CD | CD | ✓ | CD | CD | CD | ✓ | CD | ✓ | CD | CD | CD | CD | CD |
| Outcome measures valid and reliable | ✓ | ✓ | ✓ | ✓ | ✓ | ✓ | ✓ | ✓ | ✓ | ✓ | ✓ | ✓ | ✓ | ✓ | ✓ |
| Power analysis >80% | ✓ | ✓ | CD | ✓ | ✓ | ✓ | ✓ | CD | ✓ | ✓ | CD | X | CD | X | ✓ |
| Outcomes reported | ✓ | ✓ | ✓ | ✓ | ✓ | ✓ | ✓ | ✓ | ✓ | ✓ | ✓ | ✓ | ✓ | ✓ | ✓ |
| Intent-to-treat analysis used | ✓ | ✓ | ✓ | ✓ | ✓ | ✓ | ✓ | ✓ | ✓ | ✓ | ✓ | ✓ | X | X | ✓ |
| **Rating** | **Good** | **Good** | **Good** | **Good** | **Good** | **Good** | **Good** | **Good** | **Good** | **Good** | **Good** | **Fair** | **Fair** | **Fair** | **Fair** |
| ✓: met, X: unmet; NA: not applicable; CD: cannot determine (not addressed in the article) | | | | | | | | | | | | | | | |

| **Table S1B: NIH Quality Assessment Tool for Pretest-Posttest Studies with No Control Group** | | | | | | |
| --- | --- | --- | --- | --- | --- | --- |
|  | **Carlson et al. 200723** | **Tamagawa et al. 201526** | **Poletti et al. 201936** | **Lengacher et al. 201228** | **Lengacher et al. 201829** | **Donovan et al. 201940** |
| Study objectives stated | ✓ | ✓ | ✓ | ✓ | ✓ | ✓ |
| Eligibility criteria described | ✓ | ✓ | ✓ | ✓ | ✓ | ✓ |
| Sample representativeness | ✓ | ✓ | ✓ | ✓ | ✓ | ✓ |
| All eligible participants enrolled | X | X | X | X | X | X |
| Sample size sufficient | X | X | X | X | X | X |
| Intervention clearly described | ✓ | ✓ | ✓ | ✓ | ✓ | ✓ |
| Outcomes valid and reliable | ✓ | ✓ | ✓ | ✓ | ✓ | ✓ |
| Outcome assessor blinded | ✓ | ✓ | ✓ | ✓ | ✓ | ✓ |
| Attrition <20% | ✓ | ✓ | ✓ | ✓ | ✓ | ✓ |
| Statistical methods used to examine changes in outcomes | ✓ | X | ✓ | ✓ | ✓ | ✓ |
| Interrupted time-series design used | X | X | X | X | X | X |
| Group effects evaluated if the treatment was at a group level | NA | NA | NA | NA | NA | NA |
| **Rating** | **Fair** | **Fair** | **Fair** | **Fair** | **Fair** | **Fair** |
| ✓: met, X: unmet; NA: not applicable; CD: cannot determine (not addressed in the article) | | | | | |  |
